# Supplementary material for: Three-dimensional bilayer garnet solid electrolyte based high energy density lithium metal–sulfur batteries
Source: Royal Society of Chemistry journal article supplement (doi:10.1039/c7ee01004d), 2017-01-01
Supplement: c7ee01004d1.pdf [file c7ee01004d1.pdf]

## **Three-Dimensional Bilayer Garnet Solid Electrolyte Based High Energy Density Li Metal-Sulfur Batteries**

Kun (Kelvin) Fu,<sup>1,2,(a)</sup> Yunhui Gong,<sup>1,2,(a)</sup> Gregory T. Hitz,<sup>1,2,(a)</sup> Dennis W. McOwen,<sup>1,2,(a)</sup> Yiju Li,<sup>2</sup> Shaomao Xu,<sup>1,2</sup> Yang Wen,<sup>1,2</sup> Lei Zhang,<sup>1,2</sup> Chengwei Wang,<sup>1,2</sup> Glenn Pastel,<sup>2</sup> Jiaqi Dai,<sup>2</sup> Boyang Liu,<sup>2</sup> Hua Xie,<sup>2</sup> Yonggang Yao,<sup>2</sup> Eric D. Wachsman,<sup>1,2,\*</sup> Liangbing Hu<sup>1,2,\*</sup>

<sup>1</sup>University of Maryland Energy Research Center, University of Maryland, College Park, Maryland, 20742

<sup>2</sup>Department of Materials Science and Engineering, University of Maryland, College Park, Maryland, 20742

<sup>(a)</sup> Equally contributed

\* Corresponding author: [binghu@umd.edu](mailto:binghu@umd.edu); [ewach@umd.edu](mailto:ewach@umd.edu)

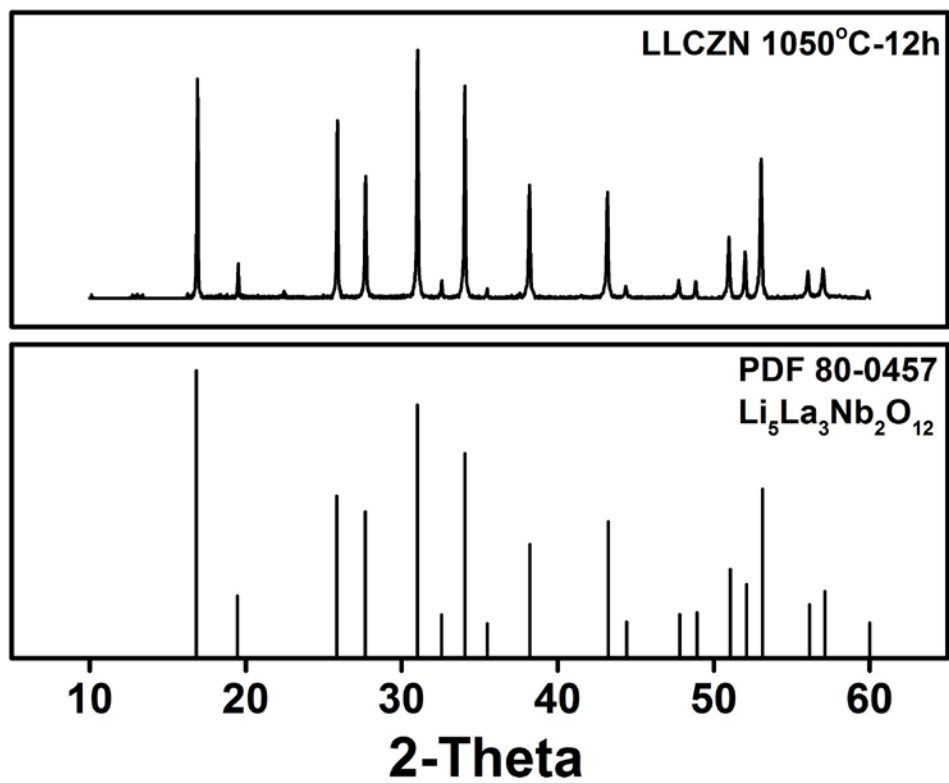

Figure S1. XRD pattern of sintered garnet (LLCZNO). Cubic garnet-type  $\text{Li}_5\text{La}_3\text{Nb}_2\text{O}_{12}$  (PDF 80-0457) is used as the standard XRD pattern to confirm the phase structure of the as-synthesized materials.

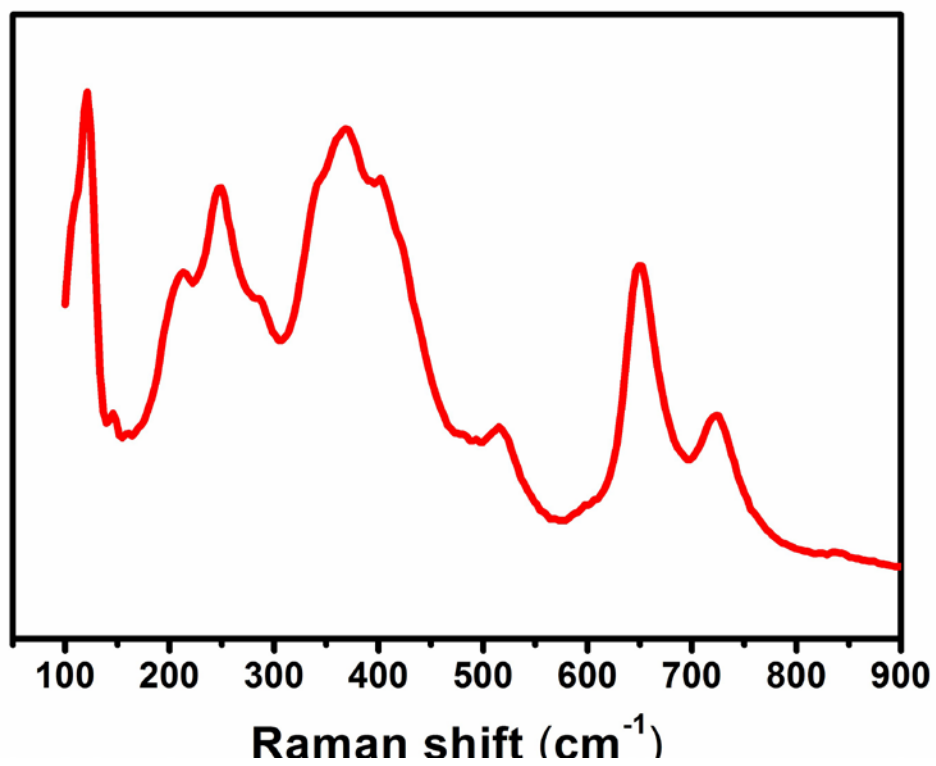

Figure S2. Raman spectrum of LLCZNO to confirm the cubic garnet phase.

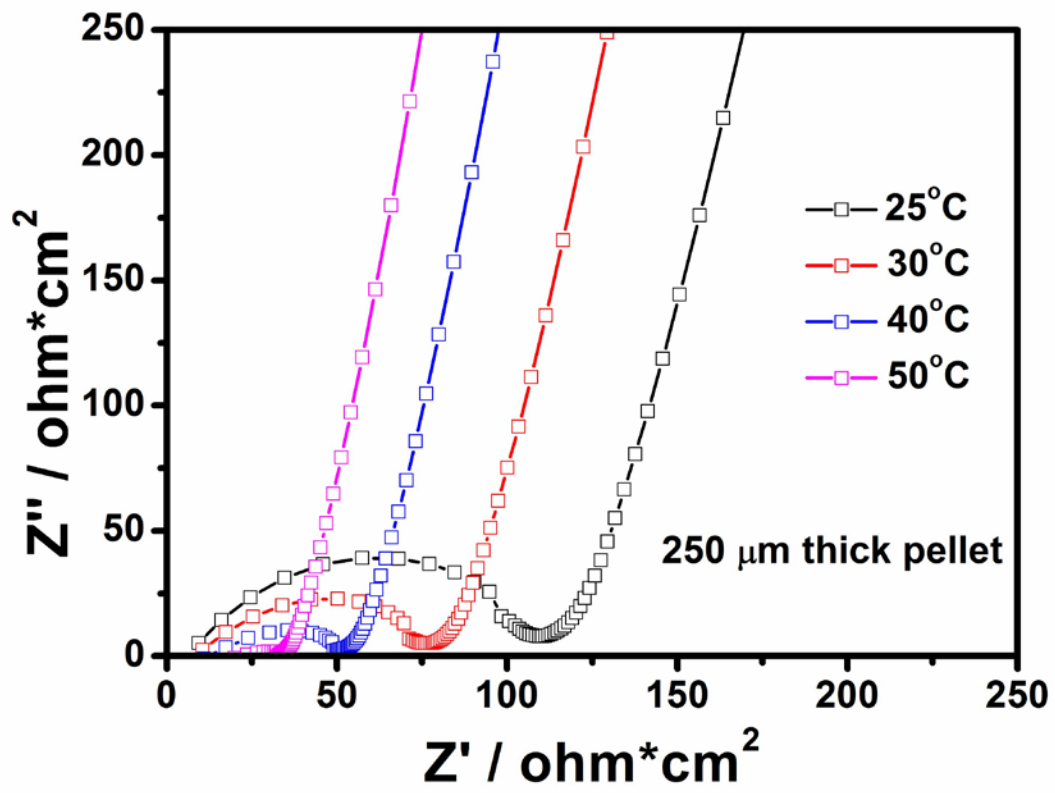

Figure S3. Nyquist plots of the dense garnet solid-state electrolyte pellet at different temperatures (25, 30, 40, and 50°C). The dense garnet pellet had a thickness of  $\sim 250$  μm.

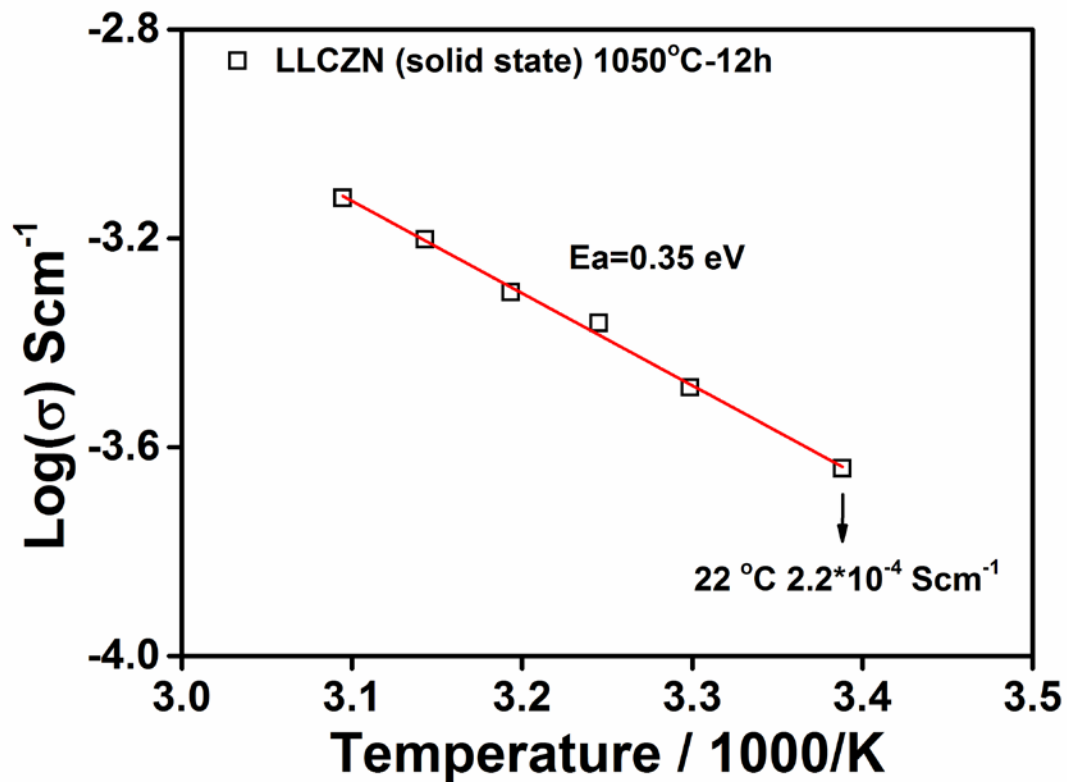

Figure S4. Arrhenius plot of garnet solid-state electrolyte conductivity. The activation energy is 0.35 eV.

**Table S1.** The calculations of the specific energy density of the tested garnet bilayer Li-S battery.

|                                            |       |
|--------------------------------------------|-------|
| Bilayer garnet (mg/cm <sup>2</sup> )       | 20    |
| Sulfur (mg/cm <sup>2</sup> )               | 7.5   |
| CNT (mg/cm <sup>2</sup> )                  | 1     |
| Liquid electrolyte (mg/cm <sup>2</sup> )   | 7.5   |
| Li metal (mg/cm <sup>2</sup> ) (Estimated) | 3     |
| Total mass (mg/cm <sup>2</sup> )           | 39    |
| Energy (Wh/cm <sup>2</sup> )               | 9.68  |
| Specific energy density (Wh/kg)            | 248.2 |

This newly develop porous-dense bilayer framework represents a promising strategy to revolutionize Li-metal batteries. With further optimization of the thickness and mass-loading with Li metal and S cathodes, a cell energy density over 900 Wh/kg (Table S3) is achievable.

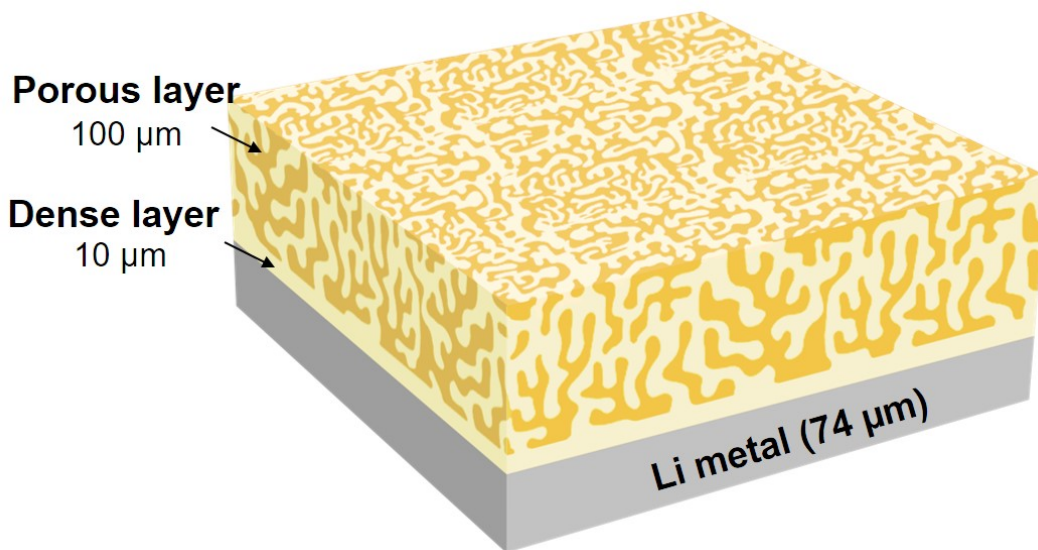

Figure S5. Schematic of a bilayer solid-state battery. The bilayer solid-state electrolyte framework has several unique advantages: (a) the thin dense layer is a mechanical barrier with high elastic modulus that can efficiently separate the electrodes from liquid electrolyte and prevent Li dendrite penetration; (2) the thick porous layer mechanically supports the thin dense layer; (3) the interface between dense and porous layers is well sintered with good mechanical integrity and continuous ion transport; (4) the solid-state framework can provide electronic and ionic conducting pathways for the encapsulated cathode materials; (5) the solid-state framework can physically confine the cathode materials locally and accommodate the volume change of the cathode materials, such as solid sulfur and polysulfide catholyte.

**Table S2.** Projected energy density of bilayer garnet solid-state Li-S batteries with optimized parameters.

|                    | Material | Volume ratio | Volume (cm <sup>3</sup> ) | Density (g/cm <sup>3</sup> ) | Mass (mg/cm <sup>2</sup> ) | Specific Capacity (mAh/g) | Capacity (mAh/cm <sup>2</sup> ) | Loading (mg/cm <sup>2</sup> ) |
|--------------------|----------|--------------|---------------------------|------------------------------|----------------------------|---------------------------|---------------------------------|-------------------------------|
| <b>Cathode</b>     | Garnet   | 15%          | 0.15                      | 4.97                         | 7.450                      | 0                         | 0.0                             |                               |
| 100 um             | Sulfur   | 47%          | 0.47                      | 1.96                         | 9.210                      | 1,675                     | 15.4                            | 9.2                           |
|                    | CNT      | 15%          | 0.15                      | 1.7                          | 2.550                      | 0                         | 0.0                             |                               |
|                    | Empty    | 23%          | 0.23                      | 0                            | 0.000                      | 0                         | 0.0                             |                               |
| <b>Electrolyte</b> | Garnet   | 100%         | 0.10                      | 4.97                         | 4.970                      | 0                         | 0.0                             |                               |
| 10 um              |          |              |                           |                              |                            |                           |                                 |                               |
| <b>Anode</b>       | Lithium  | 100%         | 0.74                      | 0.54                         | 3.996                      | 3,861                     | 15.4                            | 4.0                           |
| 74 um              |          |              |                           |                              |                            |                           |                                 |                               |
| Totals:            |          |              | 1.940083                  |                              | 32.61345                   |                           | 15.4                            |                               |
| Energy Density     |          |              |                           |                              |                            |                           | 993.6 Wh/kg                     |                               |
|                    |          |              |                           |                              |                            |                           | 1,670.2 Wh/L                    |                               |
